# Supplementary material for: Long-Term Stability of Polymer-Coated Surface Transverse Wave Sensors for the Detection of Organic Solvent Vapors
Source: MDPI journal article supplement (doi:10.3390/s17112529), 2017-11-03
Supplement: s1 [file s1]

**Table S2.** Normalized difference frequency shifts obtained with the STW sensor array.

Samples were (a) chloroform, (b) octane, and (c) xylene. One representative measurement was chosen from each of the three solvent vapor concentrations (see Table 3); and the difference frequency shifts of all sensors were normalized to the corresponding difference frequency shift of sensor 1 (i.e., the maximum difference frequency shift). The following tables summarize mean  $\pm$  standard deviation (S) values of the difference frequency shifts as well as relative standard deviations (RSD) obtained for each measurement date ( $n = 3$ ). RSD values in the table result from unrounded mean and standard deviation values.

**Table S2. (a) Chloroform**

| Sensor No. | Month 1           |     | Month 7           |     | Month 13          |     | Month 19          |     | Month 25          |     | Month 31          |     | Month 37          |     |
|------------|-------------------|-----|-------------------|-----|-------------------|-----|-------------------|-----|-------------------|-----|-------------------|-----|-------------------|-----|
|            | Mean $\pm$ S      | RSD |
|            | [-]               | [%] | [-]               | [%] | [-]               | [%] | [-]               | [%] | [-]               | [%] | [-]               | [%] | [-]               | [%] |
| 1          | 1.000 $\pm$ 0.000 | 0.0 |
| 2          | 0.133 $\pm$ 0.008 | 5.8 | 0.111 $\pm$ 0.008 | 7.2 | 0.116 $\pm$ 0.004 | 3.7 | 0.104 $\pm$ 0.004 | 3.6 | 0.105 $\pm$ 0.006 | 5.4 | 0.096 $\pm$ 0.005 | 5.3 | 0.100 $\pm$ 0.003 | 3.5 |
| 3          | 0.433 $\pm$ 0.003 | 0.7 | 0.429 $\pm$ 0.002 | 0.6 | 0.418 $\pm$ 0.006 | 1.6 | 0.421 $\pm$ 0.010 | 2.3 | 0.415 $\pm$ 0.002 | 0.4 | 0.411 $\pm$ 0.007 | 1.7 | 0.399 $\pm$ 0.005 | 1.2 |
| 4          | 0.261 $\pm$ 0.007 | 2.6 | 0.250 $\pm$ 0.001 | 0.6 | 0.242 $\pm$ 0.002 | 0.8 | 0.249 $\pm$ 0.006 | 2.6 | 0.243 $\pm$ 0.006 | 2.6 | 0.242 $\pm$ 0.006 | 2.5 | 0.235 $\pm$ 0.004 | 1.5 |
| 5          | 0.104 $\pm$ 0.001 | 1.1 | 0.105 $\pm$ 0.004 | 3.5 | 0.103 $\pm$ 0.005 | 4.7 | 0.102 $\pm$ 0.004 | 3.5 | 0.103 $\pm$ 0.002 | 1.6 | 0.099 $\pm$ 0.003 | 3.4 | 0.102 $\pm$ 0.002 | 2.4 |
| 6          | 0.181 $\pm$ 0.002 | 0.9 | 0.179 $\pm$ 0.007 | 3.7 | 0.183 $\pm$ 0.002 | 1.2 | 0.174 $\pm$ 0.003 | 1.9 | 0.183 $\pm$ 0.002 | 0.9 | 0.171 $\pm$ 0.002 | 1.4 | 0.176 $\pm$ 0.003 | 1.6 |
| 7          | 0.059 $\pm$ 0.002 | 2.7 | 0.061 $\pm$ 0.003 | 4.4 | 0.057 $\pm$ 0.004 | 6.5 | 0.056 $\pm$ 0.005 | 8.9 | 0.057 $\pm$ 0.003 | 5.6 | 0.056 $\pm$ 0.005 | 8.6 | 0.056 $\pm$ 0.005 | 9.4 |
| 8          | 0.137 $\pm$ 0.004 | 3.0 | 0.146 $\pm$ 0.010 | 6.6 | 0.149 $\pm$ 0.003 | 1.8 | 0.144 $\pm$ 0.003 | 1.9 | 0.159 $\pm$ 0.004 | 2.3 | 0.141 $\pm$ 0.003 | 2.3 | 0.166 $\pm$ 0.003 | 1.6 |

**Table S2. (b) Octane**

| Sen-<br>sor<br>No. | Month 1      |     | Month 7              |      | Month 13             |     | Month 19             |     | Month 25             |     | Month 31             |     | Month 37             |     |
|--------------------|--------------|-----|----------------------|------|----------------------|-----|----------------------|-----|----------------------|-----|----------------------|-----|----------------------|-----|
|                    | Mean $\pm$ S | RSD | Mean $\pm$ S         | RSD  | Mean $\pm$ S         | RSD | Mean $\pm$ S         | RSD | Mean $\pm$ S         | RSD | Mean $\pm$ S         | RSD | Mean $\pm$ S         | RSD |
|                    | [-]          | [%] | [-]                  | [%]  | [-]                  | [%] | [-]                  | [%] | [-]                  | [%] | [-]                  | [%] | [-]                  | [%] |
| 1                  | n/a          | n/a | 1.000 $\pm$<br>0.000 | 0.0  | 1.000 $\pm$<br>0.000 | 0.0 | 1.000 $\pm$<br>0.000 | 0.0 | 1.000 $\pm$<br>0.000 | 0.0 | 1.000 $\pm$<br>0.000 | 0.0 | 1.000 $\pm$<br>0.000 | 0.0 |
| 2                  | n/a          | n/a | 0.102 $\pm$<br>0.011 | 10.7 | 0.097 $\pm$<br>0.001 | 1.2 | 0.093 $\pm$<br>0.002 | 2.6 | 0.092 $\pm$<br>0.002 | 2.6 | 0.087 $\pm$<br>0.004 | 4.8 | 0.090 $\pm$<br>0.002 | 2.4 |
| 3                  | n/a          | n/a | 0.222 $\pm$<br>0.018 | 7.9  | 0.212 $\pm$<br>0.015 | 7.3 | 0.220 $\pm$<br>0.014 | 6.5 | 0.220 $\pm$<br>0.013 | 5.9 | 0.215 $\pm$<br>0.012 | 5.4 | 0.213 $\pm$<br>0.012 | 5.5 |
| 4                  | n/a          | n/a | 0.087 $\pm$<br>0.004 | 5.0  | 0.086 $\pm$<br>0.003 | 3.6 | 0.085 $\pm$<br>0.003 | 3.5 | 0.088 $\pm$<br>0.003 | 3.6 | 0.085 $\pm$<br>0.001 | 1.7 | 0.087 $\pm$<br>0.002 | 2.5 |
| 5                  | n/a          | n/a | 0.184 $\pm$<br>0.010 | 5.3  | 0.165 $\pm$<br>0.002 | 1.0 | 0.164 $\pm$<br>0.002 | 1.0 | 0.164 $\pm$<br>0.002 | 0.9 | 0.157 $\pm$<br>0.005 | 3.1 | 0.159 $\pm$<br>0.003 | 1.7 |
| 6                  | n/a          | n/a | 0.415 $\pm$<br>0.016 | 3.8  | 0.404 $\pm$<br>0.007 | 1.6 | 0.397 $\pm$<br>0.006 | 1.4 | 0.413 $\pm$<br>0.006 | 1.6 | 0.383 $\pm$<br>0.001 | 0.3 | 0.392 $\pm$<br>0.008 | 2.0 |
| 7                  | n/a          | n/a | 0.112 $\pm$<br>0.006 | 5.4  | 0.107 $\pm$<br>0.003 | 2.8 | 0.113 $\pm$<br>0.002 | 1.6 | 0.116 $\pm$<br>0.001 | 1.3 | 0.117 $\pm$<br>0.001 | 0.9 | 0.119 $\pm$<br>0.001 | 0.9 |
| 8                  | n/a          | n/a | 0.693 $\pm$<br>0.047 | 6.8  | 0.685 $\pm$<br>0.026 | 3.8 | 0.691 $\pm$<br>0.027 | 3.9 | 0.710 $\pm$<br>0.031 | 4.3 | 0.699 $\pm$<br>0.028 | 4.0 | 0.714 $\pm$<br>0.024 | 3.3 |

**Table S2. (c) Xylene**

| Sen-<br>sor<br>No. | Month 1              |     | Month 7              |     | Month 13             |     | Month 19             |     | Month 25             |     | Month 31             |      | Month 37             |     |
|--------------------|----------------------|-----|----------------------|-----|----------------------|-----|----------------------|-----|----------------------|-----|----------------------|------|----------------------|-----|
|                    | Mean $\pm$ S         | RSD  | Mean $\pm$ S         | RSD |
|                    | [-]                  | [%] | [-]                  | [%] | [-]                  | [%] | [-]                  | [%] | [-]                  | [%] | [-]                  | [%]  | [-]                  | [%] |
| 1                  | 1.000 $\pm$<br>0.000 | 0.0  | 1.000 $\pm$<br>0.000 | 0.0 |
| 2                  | 0.103 $\pm$<br>0.006 | 6.1 | 0.086 $\pm$<br>0.009 | 9.9 | 0.089 $\pm$<br>0.006 | 6.7 | 0.078 $\pm$<br>0.003 | 3.5 | 0.078 $\pm$<br>0.002 | 1.9 | 0.072 $\pm$<br>0.002 | 3.4  | 0.076 $\pm$<br>0.003 | 4.2 |
| 3                  | 0.586 $\pm$<br>0.028 | 4.7 | 0.586 $\pm$<br>0.025 | 4.3 | 0.541 $\pm$<br>0.035 | 6.5 | 0.567 $\pm$<br>0.010 | 1.8 | 0.535 $\pm$<br>0.045 | 8.5 | 0.547 $\pm$<br>0.011 | 2.0  | 0.509 $\pm$<br>0.027 | 5.2 |
| 4                  | 0.169 $\pm$<br>0.005 | 2.7 | 0.151 $\pm$<br>0.005 | 3.4 | 0.147 $\pm$<br>0.007 | 5.0 | 0.150 $\pm$<br>0.003 | 1.7 | 0.141 $\pm$<br>0.003 | 2.0 | 0.145 $\pm$<br>0.003 | 1.9  | 0.141 $\pm$<br>0.003 | 1.8 |
| 5                  | 0.148 $\pm$<br>0.003 | 1.9 | 0.137 $\pm$<br>0.005 | 3.3 | 0.132 $\pm$<br>0.002 | 1.7 | 0.129 $\pm$<br>0.004 | 3.3 | 0.133 $\pm$<br>0.005 | 4.0 | 0.125 $\pm$<br>0.005 | 4.1  | 0.127 $\pm$<br>0.002 | 1.7 |
| 6                  | 0.257 $\pm$<br>0.002 | 0.8 | 0.249 $\pm$<br>0.003 | 1.2 | 0.254 $\pm$<br>0.003 | 1.1 | 0.244 $\pm$<br>0.003 | 1.1 | 0.255 $\pm$<br>0.002 | 0.8 | 0.232 $\pm$<br>0.006 | 2.6  | 0.240 $\pm$<br>0.004 | 1.7 |
| 7                  | 0.065 $\pm$<br>0.001 | 1.4 | 0.072 $\pm$<br>0.004 | 5.5 | 0.068 $\pm$<br>0.001 | 1.8 | 0.070 $\pm$<br>0.001 | 1.7 | 0.072 $\pm$<br>0.002 | 2.7 | 0.072 $\pm$<br>0.001 | 1.6  | 0.073 $\pm$<br>0.001 | 1.1 |
| 8                  | 0.257 $\pm$<br>0.018 | 7.1 | 0.272 $\pm$<br>0.013 | 4.7 | 0.295 $\pm$<br>0.019 | 6.5 | 0.282 $\pm$<br>0.021 | 7.3 | 0.332 $\pm$<br>0.018 | 5.4 | 0.285 $\pm$<br>0.032 | 11.3 | 0.347 $\pm$<br>0.010 | 2.8 |
