# Supplementary material for: Long-Term Stability of Polymer-Coated Surface Transverse Wave Sensors for the Detection of Organic Solvent Vapors
Source: MDPI journal article supplement (doi:10.3390/s17112529), 2017-11-03
Supplement: s1 [file s1]

**Table S1.** Difference frequency shifts obtained with the STW sensor array.

Samples were (a) chloroform, 11.6 ppmv, (b) octane, 11.5 ppmv, (c) xylene, 4.5 ppmv. Measurements were performed in triplicates every six months for a period of three years with the exception of octane, which was included in the study half a year later. The following tables summarize mean  $\pm$  standard deviation (S) values of the difference frequency shifts as well as relative standard deviations (RSD) obtained for each measurement date ( $n = 3$ ). RSD values in the table result from unrounded mean and standard deviation values.

**Table S1. (a)** Chloroform, 11.6 ppmv

| Sensor No. | Month 1          |     | Month 7          |     | Month 13         |      | Month 19         |      | Month 25         |     | Month 31         |     | Month 37         |     |
|------------|------------------|-----|------------------|-----|------------------|------|------------------|------|------------------|-----|------------------|-----|------------------|-----|
|            | Mean $\pm$ S     | RSD | Mean $\pm$ S     | RSD | Mean $\pm$ S     | RSD  | Mean $\pm$ S     | RSD  | Mean $\pm$ S     | RSD | Mean $\pm$ S     | RSD | Mean $\pm$ S     | RSD |
|            | [kHz]            | [%] | [kHz]            | [%] | [kHz]            | [%]  | [kHz]            | [%]  | [kHz]            | [%] | [kHz]            | [%] | [kHz]            | [%] |
| 1          | 17.90 $\pm$ 0.30 | 1.7 | 18.52 $\pm$ 0.37 | 2.0 | 17.42 $\pm$ 1.80 | 10.3 | 16.60 $\pm$ 1.57 | 9.5  | 18.37 $\pm$ 0.59 | 3.2 | 17.72 $\pm$ 0.51 | 2.9 | 18.87 $\pm$ 0.71 | 3.8 |
| 2          | 2.25 $\pm$ 0.06  | 2.6 | 1.98 $\pm$ 0.11  | 5.5 | 2.03 $\pm$ 0.30  | 14.9 | 1.63 $\pm$ 0.14  | 8.4  | 1.91 $\pm$ 0.13  | 6.5 | 1.63 $\pm$ 0.04  | 2.6 | 1.80 $\pm$ 0.04  | 2.4 |
| 3          | 7.81 $\pm$ 0.12  | 1.5 | 8.07 $\pm$ 0.23  | 2.8 | 7.35 $\pm$ 0.80  | 10.9 | 7.11 $\pm$ 0.69  | 9.6  | 7.56 $\pm$ 0.28  | 3.7 | 7.40 $\pm$ 0.24  | 3.2 | 7.61 $\pm$ 0.31  | 4.0 |
| 4          | 4.75 $\pm$ 0.07  | 1.5 | 4.69 $\pm$ 0.16  | 3.3 | 4.22 $\pm$ 0.42  | 9.9  | 4.19 $\pm$ 0.40  | 9.5  | 4.42 $\pm$ 0.21  | 4.8 | 4.37 $\pm$ 0.15  | 3.5 | 4.51 $\pm$ 0.21  | 4.7 |
| 5          | 1.90 $\pm$ 0.04  | 1.9 | 1.91 $\pm$ 0.13  | 6.6 | 1.86 $\pm$ 0.21  | 11.5 | 1.75 $\pm$ 0.16  | 9.2  | 1.94 $\pm$ 0.07  | 3.6 | 1.80 $\pm$ 0.06  | 3.5 | 1.95 $\pm$ 0.06  | 2.9 |
| 6          | 3.22 $\pm$ 0.04  | 1.3 | 3.27 $\pm$ 0.11  | 3.4 | 3.22 $\pm$ 0.34  | 10.6 | 2.92 $\pm$ 0.27  | 9.3  | 3.39 $\pm$ 0.13  | 3.9 | 3.06 $\pm$ 0.09  | 2.9 | 3.36 $\pm$ 0.11  | 3.3 |
| 7          | 1.04 $\pm$ 0.01  | 0.8 | 1.11 $\pm$ 0.03  | 2.8 | 1.03 $\pm$ 0.11  | 10.6 | 0.98 $\pm$ 0.09  | 9.1  | 1.10 $\pm$ 0.05  | 4.2 | 1.05 $\pm$ 0.03  | 2.9 | 1.13 $\pm$ 0.04  | 3.6 |
| 8          | 2.41 $\pm$ 0.07  | 2.7 | 2.62 $\pm$ 0.10  | 4.0 | 2.64 $\pm$ 0.29  | 11.1 | 2.41 $\pm$ 0.24  | 10.0 | 3.01 $\pm$ 0.11  | 3.8 | 2.55 $\pm$ 0.08  | 3.0 | 3.17 $\pm$ 0.09  | 2.8 |

**Table S1. (b)** Octane, 11.5 ppmv

| Sensor No. | Month 1      |     | Month 7          |     | Month 13         |      | Month 19         |      | Month 25         |     | Month 31         |     | Month 37         |     |
|------------|--------------|-----|------------------|-----|------------------|------|------------------|------|------------------|-----|------------------|-----|------------------|-----|
|            | Mean $\pm$ S | RSD | Mean $\pm$ S     | RSD | Mean $\pm$ S     | RSD  | Mean $\pm$ S     | RSD  | Mean $\pm$ S     | RSD | Mean $\pm$ S     | RSD | Mean $\pm$ S     | RSD |
|            | [kHz]        | [%] | [kHz]            | [%] | [kHz]            | [%]  | [kHz]            | [%]  | [kHz]            | [%] | [kHz]            | [%] | [kHz]            | [%] |
| 1          | n/a          | n/a | 41.73 $\pm$ 1.28 | 3.1 | 40.48 $\pm$ 2.00 | 4.9  | 40.81 $\pm$ 8.14 | 19.9 | 40.60 $\pm$ 0.65 | 1.6 | 41.81 $\pm$ 0.89 | 2.1 | 41.37 $\pm$ 3.07 | 7.4 |
| 2          | n/a          | n/a | 3.86 $\pm$ 0.14  | 3.5 | 3.99 $\pm$ 0.40  | 10.0 | 3.72 $\pm$ 0.77  | 20.8 | 3.60 $\pm$ 0.05  | 1.4 | 3.47 $\pm$ 0.03  | 1.0 | 3.58 $\pm$ 0.33  | 9.3 |
| 3          | n/a          | n/a | 10.04 $\pm$ 0.28 | 2.8 | 9.36 $\pm$ 0.39  | 4.1  | 9.57 $\pm$ 1.79  | 18.6 | 9.54 $\pm$ 0.10  | 1.0 | 9.55 $\pm$ 0.10  | 1.0 | 9.43 $\pm$ 0.56  | 5.9 |
| 4          | n/a          | n/a | 3.70 $\pm$ 0.11  | 3.1 | 3.67 $\pm$ 0.24  | 6.6  | 3.63 $\pm$ 0.70  | 19.3 | 3.68 $\pm$ 0.05  | 1.3 | 3.61 $\pm$ 0.04  | 1.0 | 3.69 $\pm$ 0.27  | 7.2 |
| 5          | n/a          | n/a | 7.29 $\pm$ 0.29  | 4.0 | 6.67 $\pm$ 0.41  | 6.1  | 6.73 $\pm$ 1.43  | 21.2 | 6.65 $\pm$ 0.07  | 1.0 | 6.40 $\pm$ 0.03  | 0.4 | 6.53 $\pm$ 0.53  | 8.0 |
| 6          | n/a          | n/a | 17.24 $\pm$ 0.52 | 3.0 | 16.72 $\pm$ 0.85 | 5.1  | 16.46 $\pm$ 3.26 | 19.8 | 16.83 $\pm$ 0.34 | 2.0 | 15.93 $\pm$ 0.29 | 1.8 | 16.00 $\pm$ 1.30 | 8.1 |
| 7          | n/a          | n/a | 4.69 $\pm$ 0.14  | 3.0 | 4.39 $\pm$ 0.24  | 5.4  | 4.68 $\pm$ 0.91  | 19.4 | 4.74 $\pm$ 0.08  | 1.7 | 4.95 $\pm$ 0.08  | 1.7 | 4.92 $\pm$ 0.40  | 8.1 |
| 8          | n/a          | n/a | 26.39 $\pm$ 0.90 | 3.4 | 26.76 $\pm$ 1.45 | 5.4  | 26.99 $\pm$ 5.73 | 21.2 | 27.82 $\pm$ 0.70 | 2.5 | 27.96 $\pm$ 0.48 | 1.7 | 28.61 $\pm$ 2.34 | 8.2 |

**Table S1. (c)** Xylene, 4.5 ppmv

| Sensor<br>No. | Month 1               |            | Month 7               |            | Month 13              |            | Month 19              |            | Month 25              |            | Month 31              |            | Month 37              |            |
|---------------|-----------------------|------------|-----------------------|------------|-----------------------|------------|-----------------------|------------|-----------------------|------------|-----------------------|------------|-----------------------|------------|
|               | Mean $\pm$ S<br>[kHz] | RSD<br>[%] |
| 1             | 49.59 $\pm$ 3.92      | 7.9        | 50.00 $\pm$ 2.98      | 6.0        | 50.40 $\pm$ 8.93      | 17.7       | 39.35 $\pm$ 6.42      | 16.3       | 47.28 $\pm$ 7.93      | 16.8       | 46.70 $\pm$ 6.14      | 13.1       | 47.45 $\pm$ 4.06      | 8.5        |
| 2             | 4.67 $\pm$ 0.21       | 4.4        | 3.99 $\pm$ 0.38       | 9.4        | 4.24 $\pm$ 0.72       | 17.0       | 2.92 $\pm$ 0.47       | 16.0       | 3.75 $\pm$ 0.70       | 18.7       | 3.17 $\pm$ 0.33       | 10.5       | 3.50 $\pm$ 0.37       | 10.6       |
| 3             | 27.35 $\pm$ 2.06      | 7.5        | 27.86 $\pm$ 1.51      | 5.4        | 24.19 $\pm$ 2.87      | 11.9       | 21.98 $\pm$ 3.33      | 15.2       | 22.80 $\pm$ 2.42      | 10.6       | 24.92 $\pm$ 2.71      | 10.9       | 21.93 $\pm$ 1.33      | 6.1        |
| 4             | 8.17 $\pm$ 0.67       | 8.2        | 7.28 $\pm$ 0.50       | 6.8        | 6.99 $\pm$ 1.15       | 16.4       | 5.81 $\pm$ 0.88       | 15.2       | 6.76 $\pm$ 1.17       | 17.2       | 6.67 $\pm$ 0.79       | 11.9       | 6.63 $\pm$ 0.64       | 9.6        |
| 5             | 7.78 $\pm$ 0.52       | 6.7        | 6.94 $\pm$ 0.63       | 9.0        | 6.79 $\pm$ 1.20       | 17.6       | 5.19 $\pm$ 0.79       | 15.3       | 6.48 $\pm$ 1.18       | 18.2       | 6.01 $\pm$ 0.70       | 11.6       | 6.21 $\pm$ 0.56       | 9.0        |
| 6             | 12.81 $\pm$ 0.92      | 7.2        | 12.37 $\pm$ 0.82      | 6.6        | 12.65 $\pm$ 2.19      | 17.3       | 9.66 $\pm$ 1.52       | 15.8       | 12.10 $\pm$ 2.10      | 17.4       | 11.09 $\pm$ 1.38      | 12.4       | 11.60 $\pm$ 1.00      | 8.6        |
| 7             | 3.18 $\pm$ 0.19       | 6.1        | 3.35 $\pm$ 0.14       | 4.2        | 3.36 $\pm$ 0.57       | 17.0       | 2.75 $\pm$ 0.43       | 15.6       | 3.40 $\pm$ 0.56       | 16.6       | 3.35 $\pm$ 0.39       | 11.5       | 3.49 $\pm$ 0.32       | 9.3        |
| 8             | 14.10 $\pm$ 1.11      | 7.8        | 14.50 $\pm$ 1.30      | 9.0        | 16.05 $\pm$ 3.10      | 19.3       | 11.96 $\pm$ 2.07      | 17.3       | 16.46 $\pm$ 2.81      | 17.0       | 15.06 $\pm$ 2.32      | 15.4       | 16.91 $\pm$ 1.38      | 8.2        |
